# Supplementary material for: One-pot sol–gel synthesis of a phosphated TiO2 catalyst for conversion of monosaccharide, disaccharides, and polysaccharides to 5-hydroxymethylfurfural
Source: Royal Society of Chemistry journal article supplement (doi:10.1039/c9nj01677e), 2019-01-01
Supplement: c9nj01677e1.pdf [file c9nj01677e1.pdf]

## Supporting Information

### **One-pot sol-gel synthesis of phosphated TiO<sub>2</sub> catalyst for conversion of monosaccharide, disaccharides, and polysaccharides to 5-hydroxymethylfurfural**

Kasanneni Tirumala Venkateswara Rao\*, Sadra Souzanchi, Zhongshun Yuan,  
Chunbao (Charles) Xu\*

*Department of Chemical and Biochemical Engineering, Western University, London,  
Ontario, Canada N6A 5B9*

*\*Corresponding Author: [tvenkate@uwo.ca](mailto:tvenkate@uwo.ca), [cxu6@uwo.ca](mailto:cxu6@uwo.ca)*

Table S1. Surface atomic composition of the 15P-TiO<sub>2</sub> catalyst determined by XPS

| Catalyst                    | Surface atomic composition (%) |     |      |      |
|-----------------------------|--------------------------------|-----|------|------|
|                             | Ti                             | P   | O    | C    |
| 15P-TiO <sub>2</sub> -Fesh  | 17.0                           | 9.1 | 63.5 | 9.4  |
| 15P-TiO <sub>2</sub> -Spent | 16.2                           | 7.8 | 64   | 11.1 |

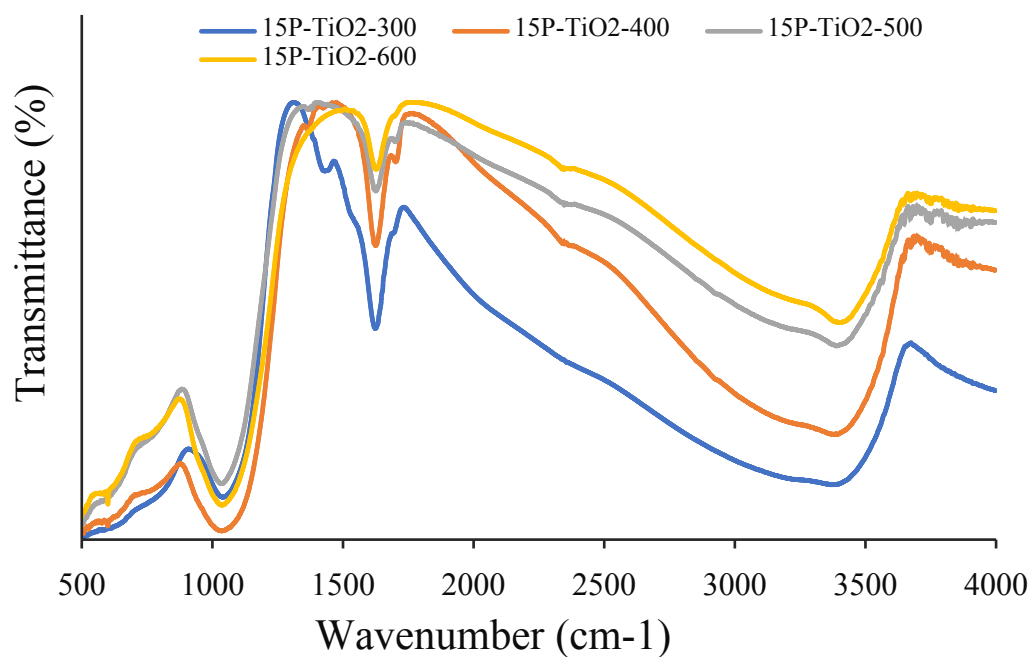

Figure S1. FT-IR spectra of 15P-TiO<sub>2</sub> catalyst calcined at various temperatures

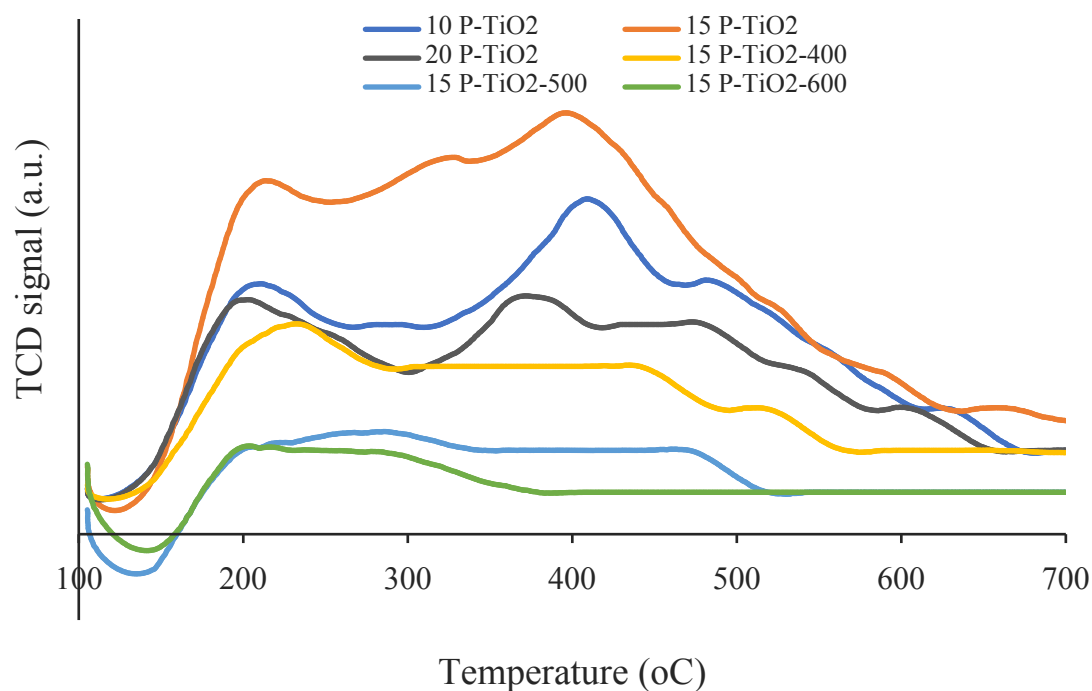

Figure S2. NH<sub>3</sub>-TPD pattern of different TiO<sub>2</sub> catalysts

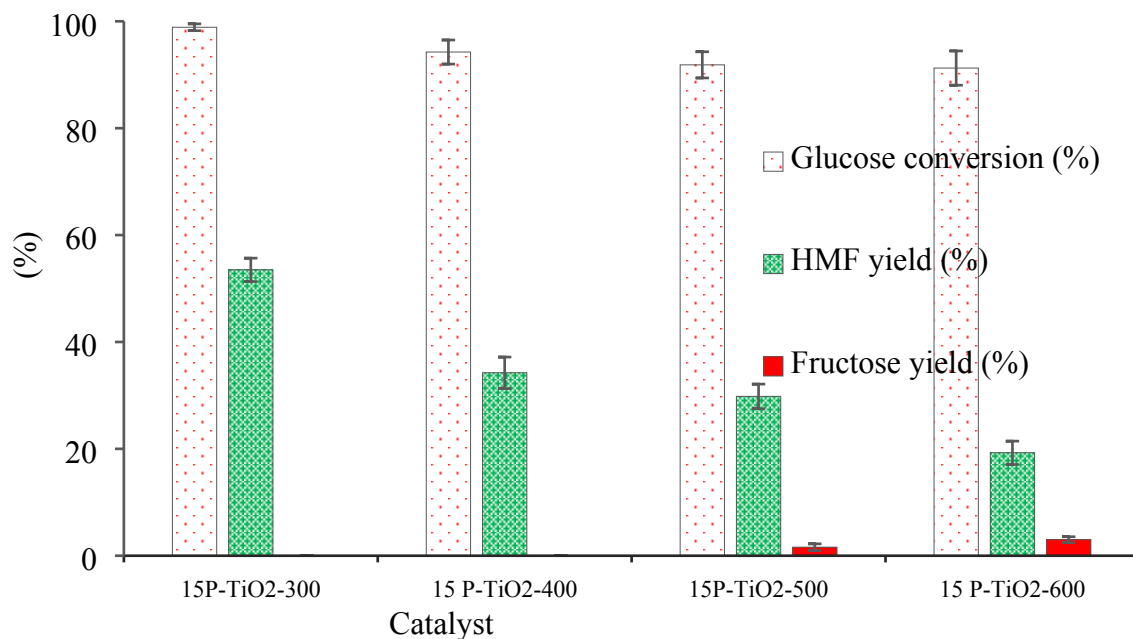

Figure S3. Effect of calcination temperature for the 15P-TiO<sub>2</sub> catalyst on dehydration of glucose. Other reaction conditions: glucose/catalyst 4:1 w/w, NaCl 0.525 g, water 3 mL, THF 12 mL, 175°C, 2h.

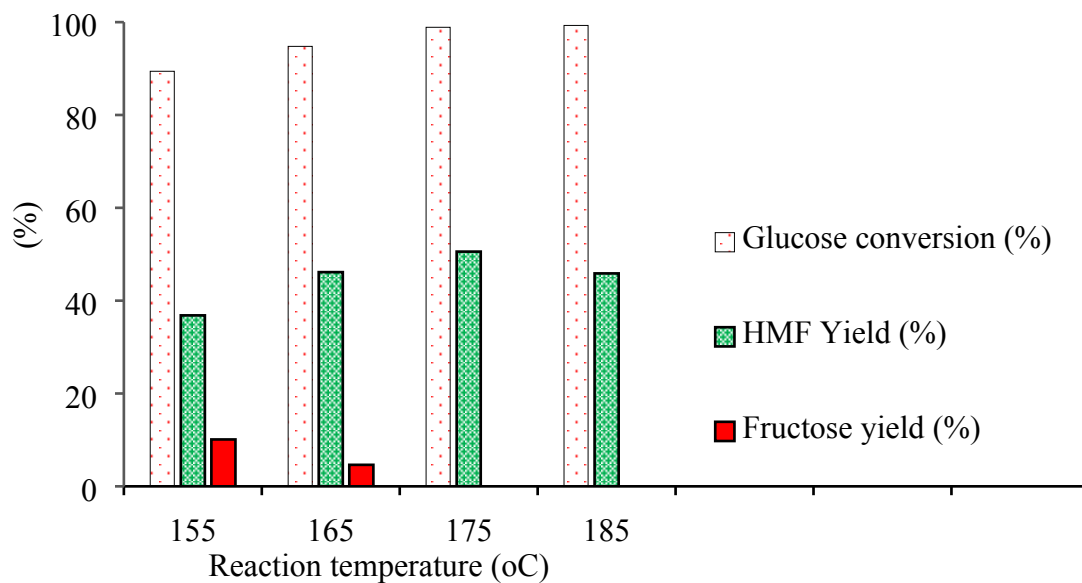

Figure S4. Effects of reaction temperature on glucose dehydration over 15P-TiO<sub>2</sub> catalyst. Other reaction conditions: glucose/catalyst 4:1 w/w, NaCl 0.525 g, water 3 mL, THF 12 mL, 175°C, 2h.

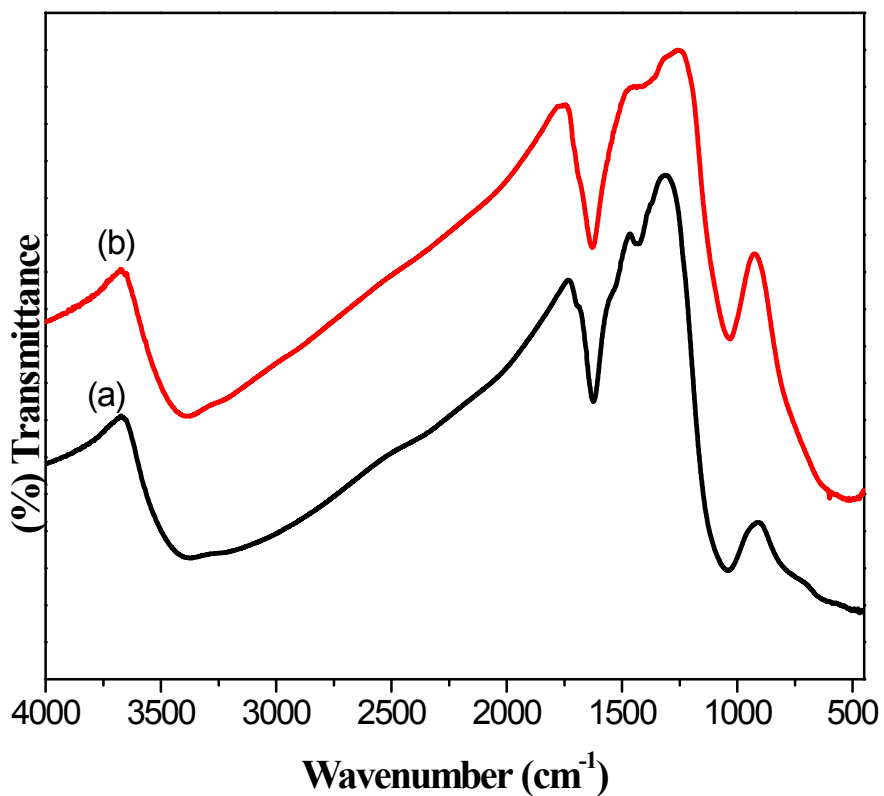

Figure S5. FT-IR spectra of (a) 15P-TiO<sub>2</sub> (Fresh) and (b) 15P-TiO<sub>2</sub> (spent) catalysts

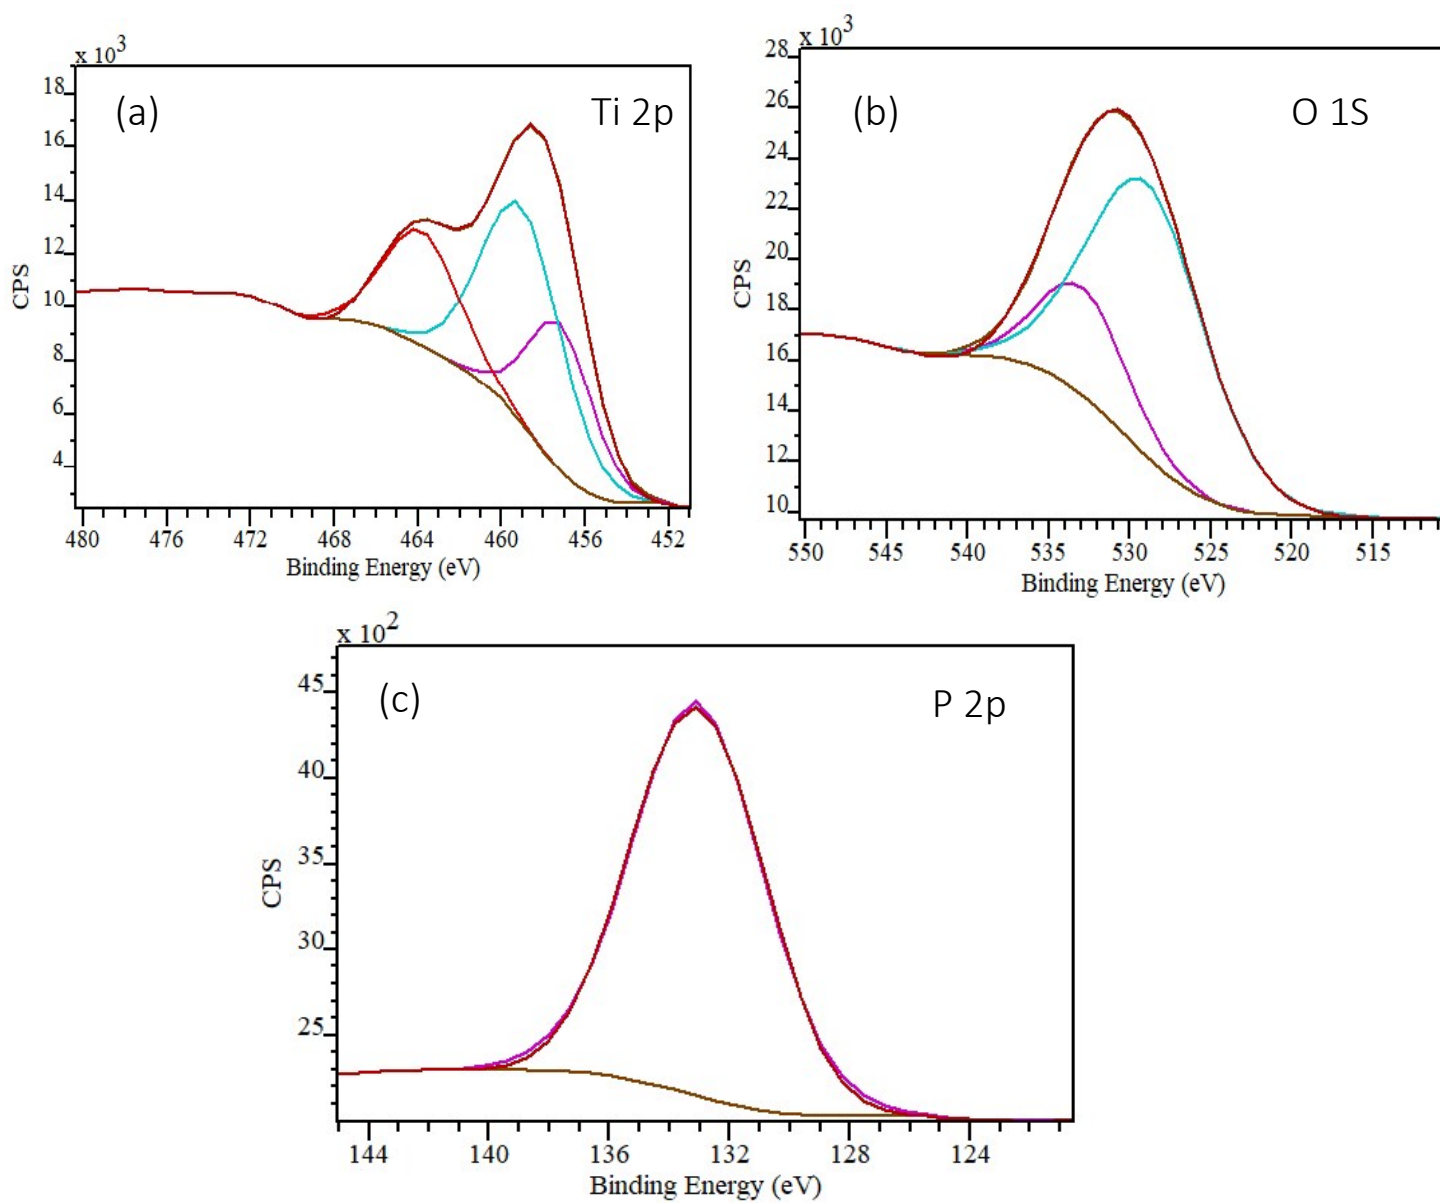

Figure S6. The XPS spectra of 15P-TiO<sub>2</sub> spent catalyst (a) Ti 2p; (b) O 1s; and (c) P 2p

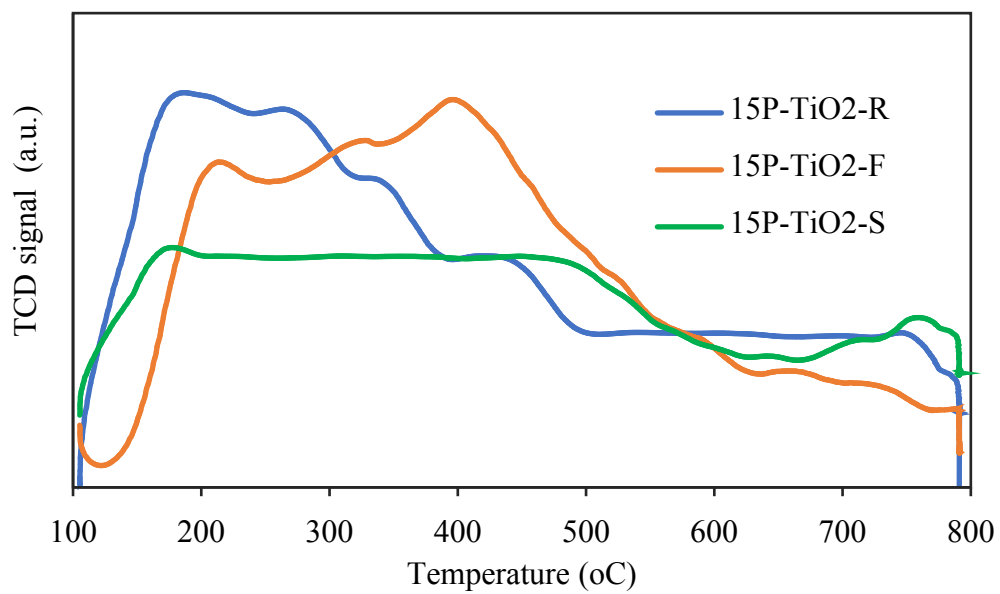

Figure S7. NH<sub>3</sub>-TPD pattern of fresh, spent and regenerated 15P-TiO<sub>2</sub> catalyst
